# Supplementary material for: A Sero-epidemiological Study of Arboviral Fevers in Djibouti, Horn of Africa
Source: PubMed Central journal article supplement (PMC4263616; doi:10.1371/journal.pntd.0003299), 2014-12-11
Supplement: pntd.0003299.s001.pdf [file pntd.0003299.s001.pdf]

Table S1

| Subject and household factors                    | Measure of association      |               |
|--------------------------------------------------|-----------------------------|---------------|
|                                                  | *aOR(95% CI)                | pvalue        |
| <b><i>Seropositivity to YF, TOSV and RVF</i></b> |                             |               |
| Age group: ≤19 yo                                | <b>11,9 ( 1,4 - 100,5 )</b> | <b>0,0230</b> |
| Gender: women                                    | 6,1 ( 0,7 - 51,8 )          | 0,0980        |
| Ethnic: Afar                                     | <b>6,5 ( 1,3 - 33,1 )</b>   | <b>0,0240</b> |
| Large family: 6 or more persons                  | 5,3 ( 0,6 - 44,5 )          | 0,1270        |
| <b><i>Seropositivity to TOSV and RVF</i></b>     |                             |               |
| Gender: women                                    | 3,2 ( 0,7 - 15,5 )          | 0,1530        |
| Age group: ≤19 yo                                | <b>7,7 ( 1,5 - 40,4 )</b>   | <b>0,0160</b> |
| Residential District: 2                          | <b>4,8 ( 1,0 - 21,7 )</b>   | <b>0,0430</b> |
| Large family: 6 or more persons                  | <b>6,9 ( 1,2 - 39,2 )</b>   | <b>0,0280</b> |
| Ethnic: Afar                                     | 4,7 ( 0,9 - 23,6 )          | 0,0580        |
| <b><i>Seropositivity to TOSV and YF</i></b>      |                             |               |
| Gender: women                                    | 3,3 ( 0,7 - 16,1 )          | 0,1470        |
| Ethnic: Afar                                     | 4,0 ( 0,8 - 19,1 )          | 0,0800        |
| Large family: 6 or more persons                  | 3,3 ( 0,7 - 16,3 )          | 0,1410        |
| Age group: ≤19 yo                                | <b>6,4 ( 1,3 - 31,9 )</b>   | <b>0,0240</b> |
| <b><i>Seropositivity to RVF and YF</i></b>       |                             |               |
| Gender: women                                    | 2,7 ( 0,5 - 13,6 )          | 0,2310        |
| Age group: ≤19 yo                                | 4,5 ( 0,9 - 23,2 )          | 0,0710        |
| SES level: Upper                                 | 3,5 ( 0,7 - 17,9 )          | 0,1330        |
| Large family: 6 or more persons                  | 6,4 ( 0,8 - 52,7 )          | 0,0840        |
| Ethnic: Afar                                     | 3,9 ( 0,8 - 18,7 )          | 0,0880        |

\*adjusted odd ratio

NOTE: Factors with statistical significant association (at p<0.05) are **bolden**
