# Supplementary material for: A Sero-epidemiological Study of Arboviral Fevers in Djibouti, Horn of Africa
Source: PubMed Central journal article supplement (PMC4263616; doi:10.1371/journal.pntd.0003299), 2014-12-11
Supplement: pntd.0003299.s002.pdf [file pntd.0003299.s002.pdf]

Table S2:

| Subject and household factors | DENV                        | TBE                          | WNV                | YF                         | CHIK                        | TOSV              | RFV                        |
|-------------------------------|-----------------------------|------------------------------|--------------------|----------------------------|-----------------------------|-------------------|----------------------------|
|                               | OR 95% CI                   | OR 95% CI                    | OR 95% CI          | OR 95% CI                  | OR 95% CI                   | OR 95% CI         | OR 95% CI                  |
| Age group: ≤19 years          | 0,8 ( 0,6 - 1,1 )           | 1.7 ( 0.2 - 12.1 )           | 0.6 ( 0.1 - 5.4 )  | 2,3 ( 0,7 - 7,26 )         | 0.9 ( 0.4 - 2.1 )           | 1,5 ( 0,7 - 3,1 ) | <b>5,2 ( 1,5 - 18,0 )*</b> |
| 20-39years                    | ref                         | n                            | 1.2 ( 0.2 - 8.8 )  | 0.6 ( 0.2 - 2.1 )          | 1,94 ( 0,88 - 4,3 )         | ref               | ref                        |
| 40-59 years                   | 0,8 ( 0,5 - 1,2 )           | 5.6 ( 0.8 - 39.6 )           | 1.9 ( 0.2 -18.6 )  | 0.5 ( 0.1 - 4.0 )          | n                           | 1,0 ( 0,3 - 3,0 ) | 3,0 ( 0,6 - 14,5 )         |
| ≥60 years                     | 1,3 ( 0,8 - 2,3 )           | n                            | n                  | n                          | 2.3 ( 0.6 - 9.4 )           | 0,9 ( 0,1 - 6,9 ) | n                          |
| Gender: women                 | 0,8 ( 0,6 - 1,1 )           | 0,8 ( 0,1 - 5,84 )           | 2.4 ( 0.3 -23.3 )  | 1,5 ( 0,5 - 4,68 )         | 0,6 ( 0,27 - 1,3 )          | 1,4 ( 0,7 - 2,9 ) | 1,0 ( 0,4 - 2,5 )          |
| Family: small ≤3 persons      | ref                         | n                            | ref                | ref                        | ref                         | ref               | ref                        |
| medium (4 or 5 persons)       | <b>1,8 ( 1,3 - 2,3 )***</b> | n                            | 4,4 ( 0,4 - 48 )   | 1,64 ( 0,4 - 7,27 )        | 0,7 ( 0,2 - 2,7 )           | 1,2 ( 0,5 - 2,5 ) | 2,6 ( 0,9 - 7,5 )          |
| large (≥6 persons)            | <b>1,4 ( 1,0 - 2,0 )*</b>   | n                            | 3,5 ( 0,2 - 56 )   | <b>4,3 ( 1,2 - 16,0 )*</b> | <b>4,2 ( 1,8 - 10,0 )**</b> | 1,2 ( 0,5 - 3,1 ) | <b>3,5 ( 1,1 - 10,6 )*</b> |
| Children in household: (0)    | ref                         | n                            | n                  | ref                        | ref                         | ref               | ref                        |
| few(≤3)                       | <b>0,7 ( 0,5 - 0,9 )**</b>  | n                            | n                  | 1,13 ( 0,3 - 4,33 )        | 0,6 ( 0,2 - 1,4 )           | 1,6 ( 0,6 - 4,2 ) | 3,4 ( 0,8 - 14,8 )         |
| more(4 ≥)                     | 1,0 ( 0,6 - 1,5 )           | n                            | n                  | 2,14 ( 0,4 - 12,6 )        | 1,1 ( 0,3 - 3,8 )           | 2,1 ( 0,6 - 7,4 ) | 4,8 ( 0,8 - 28,2 )         |
| Ethnicity: Afar               | 1,3 ( 0,9 - 1,8 )           | n                            | n                  | 1.9 ( 0.4 - 8.5 )          | 2,0 ( 0,83 - 5,0 )          | 1.0 ( 0.3 - 3.1 ) | 1.8 ( 0.5 - 5.9 )          |
| Arab                          | 0,8 ( 0,6 - 1,2 )           | n                            | 1.5 ( 0.17 -15.1 ) | 1.0 ( 0.2 - 4.3 )          | 1,0 ( 0,3 - 3,4 )           | 1.3 ( 0.6 - 3.0 ) | 2.2 ( 0.9 - 5.7 )          |
| Ethiopia                      | 0,7 ( 0,4 - 1,5 )           | n                            | n                  | n                          | 2,2 ( 0,5 - 9,6 )           | 1.2 ( 0.3 - 4.9 ) | 1.0 ( 0.1 - 7.5 )          |
| Migrants                      | 1,0 ( 0,3 - 2,6 )           | <b>19.6 ( 2.2 - 176.9 )*</b> | n                  | n                          | 3,4 ( 0,5 - 24,8 )          | n                 | n                          |
| Somalis                       | ref                         | 1.8 ( 0.19 - 17.6 )          | 1.8 ( 0.2 -17.9 )  | 0.9 ( 0.3 - 2.7 )          | ref                         | 0.9 ( 0.5 - 1.8 ) | 0.5 ( 0.2 - 1.1 )          |
| SES Level: low                | 1,0 ( 0,6 - 1,6 )           | 5.4 ( 0.6 - 52.2 )           | n                  | 0,21 ( 0,0 - 2,27 )        | 0,34 ( 0,11 - 1,2 )         | 1,3 ( 0,3 - 4,5 ) | 0,6 ( 0,2 - 2,2 )          |
| middle                        | ref                         | n                            | n                  | 9,53 ( 0,9 - 104 )         | ref                         | ref               | ref                        |
| upper                         | 1,3 ( 0,8 - 2,2 )           | 0.3 ( 0.0 - 3.2 )            | n                  | 10,1 ( 1,3 - 80,6 )        | 0,36 ( 0,1 - 1,2 )          | 1,3 ( 0,4 - 4,5 ) | 0,5 ( 0,2 - 1,8 )          |

**NOTE: Bold face** crude odd ratio(OR) indicates a statistical significant association; with \* for pvalue of 0.05 to ≤ 0.0051, \*\* for pvalue of 0.005 to ≤ 0.00011, and \*\*\* for ≤ 0.0001

A letter "n" represents an association that could not be estimated due to data limitation

Table S2

.....Continuation

| Occupation and literacy factors    | DENV<br>OR 95% CI           | TBE<br>OR 95% CI            | WNV<br>OR 95% CI            | YF<br>OR 95% CI            | CHIK<br>OR 95% CI         | TOSV<br>OR 95% CI           | RFV<br>OR 95% CI           |                   |
|------------------------------------|-----------------------------|-----------------------------|-----------------------------|----------------------------|---------------------------|-----------------------------|----------------------------|-------------------|
| Occupation: ≤13years               | 1,1 ( 0,7 - 1,7 )           | n                           | <b>13.6 ( 1.9 - 94.5 )*</b> | 3,44 ( 0,3 - 37,3 )        | 1,0 ( 0,2 - 4,2 )         | 0,9 ( 0,2 - 3,8 )           | n                          |                   |
| Employed                           | 0,7 ( 0,4 - 1,0 )           | 1,4 ( 0,1 - 15,1 )          | 1,6 ( 0,2 - 15,6 )          | <b>5,5 ( 1,0 - 29,7 )*</b> | 0,2 ( 0,0 - 1,5 )         | 0,7 ( 0,2 - 2,2 )           | 1,3 ( 0,4 - 3,9 )          |                   |
| Jobless                            | ref                         | ref                         | 0,4 ( 0,0 - 3,5 )           | ref                        | ref                       | ref                         | <b>0.2 ( 0.1 - 0.7)*</b>   |                   |
| Student                            | <b>0,6 ( 0,4 - 0,8 )*</b>   | 0,8 ( 0,1 - 8,8 )           | n                           | 3,9 ( 0,8 - 20,2 )         | 0,7 ( 0,3 - 1,7 )         | 1,2 ( 0,5 - 2,5 )           | <b>4,1 ( 1,6 - 10,2)**</b> |                   |
| Education: ≤5years                 | 0,8 ( 0,4 - 1,4 )           | n                           | 6,1 ( 0,6 - 57,1 )          | 2,0 ( 0,2 - 21,7 )         | n                         | 0,7 ( 0,1 - 5,3 )           | <b>0,0 ( 0,0 - 0,0)***</b> |                   |
| Illiterate                         | <b>0,7 ( 0,5 - 0,9 )*</b>   | 0,5 ( 0,0 - 7,4 )           | 2,8 ( 0,4 - 19,4 )          | 0,4 ( 0,0 - 4,2 )          | 0,4 ( 0,1 - 1,3 )         | 0,8 ( 0,3 - 2,4 )           | 0,4 ( 0,0 - 4,2 )          |                   |
| Basic education                    | ref                         | n                           | 1,2 ( 0,1 - 12,2 )          | ref                        | 1,7 ( 0,7 - 4,0 )         | ref                         | ref                        |                   |
| Bac+                               | 0,8 ( 0,5 - 1,2 )           | n                           | n                           | 1,7 ( 0,2 - 11,7 )         | 0,7 ( 0,2 - 2,8 )         | 1,1 ( 0,3 - 3,9 )           | 1,7 ( 0,2 - 11,7 )         |                   |
| Working from outdoors:             | 0,7 ( 0,4 - 1,4 )           | n                           | n                           | n                          | 1,8 ( 0,3 - 9,5 )         | 1,0 ( 0,2 - 4,8 )           | 1,2 ( 0,1 - 11,2 )         |                   |
| Working from indoors:              | 0,7 ( 0,4 - 1,3 )           | 1,6 ( 0,1 - 17,6 )          | 3,4 ( 0,2 - 53 )            | 5,0 ( 0,9 - 29,5 )         | 0,8 ( 0,1 - 7,4 )         | 0,8 ( 0,2 - 3,9 )           | <b>4,5 ( 1,0 - 19,5)*</b>  |                   |
| <b>Residential environ factors</b> |                             |                             |                             |                            |                           |                             |                            |                   |
| Residential District:              | 1                           | <b>2,2 ( 1,6 - 3,0 )***</b> | n                           | 5,3 ( 0,6 - 51,0 )         | 1,8 ( 0,6 - 5,4 )         | <b>9,6 ( 2,3 - 40,8 )**</b> | <b>2,1 ( 1,0 - 4,6)*</b>   | 1,2 ( 0,4 - 3,1 ) |
|                                    | 2                           | ref                         | 5,1 ( 0,5 - 48,6 )          | n                          | 1,7 ( 0,6 - 5,3 )         | ref                         | ref                        | ref               |
|                                    | 3                           | 0,9 ( 0,6 - 1,5 )           | n                           | 1,2 ( 0,1 - 11,7 )         | n                         | 0,9 ( 0,1 - 9,4 )           | 0,4 ( 0,1 - 1,7 )          | 0,7 ( 0,2 - 2,8 ) |
|                                    | 4                           | 1,4 ( 0,7 - 2,5 )           | n                           | n                          | n                         | 3,2 ( 0,3 - 34,6 )          | 1,4 ( 0,3 - 6,3 )          | 0,9 ( 0,1 - 7,3 ) |
| Living nearby river bank:          | <b>1,7 ( 1,1 - 2,7 )*</b>   | 6,8 ( 0,7 - 64,2 )          | n                           | n                          | 1,2 ( 0,2 - 9,0 )         | n                           | n                          |                   |
| Living nearby dumpsite:            | <b>0,5 ( 0,3 - 0,8 )*</b>   | n                           | n                           | 0,5 ( 0,1 - 3,7 )          | n                         | 2,0 ( 0,9 - 4,6 )           | 2,2 ( 0,8 - 6,2 )          |                   |
| Living nearby food market:         | <b>0,5 ( 0,3 - 0,6 )***</b> | 1,3 ( 0,2 - 9,42 )          | 0,7 ( 0,1 - 7,4 )           | 0,5 ( 0,1 - 1,7 )          | <b>0,1 ( 0,0 - 0,6 )*</b> | 0,8 ( 0,4 - 1,6 )           | 1,0 ( 0,4 - 2,5 )          |                   |
| Living nearby Vegetable market:    | <b>0,6 ( 0,4 - 0,8 )**</b>  | 2,4 ( 0,3 - 17,1 )          | 0,8 ( 0,1 - 7,8 )           | 0,2 ( 0,0 - 1,7 )          | n                         | 0,8 ( 0,4 - 1,8 )           | 0,9 ( 0,3 - 2,4 )          |                   |
| Living nearby abattoir:            | <b>0,4 ( 0,3 - 0,6 )***</b> | 2,8 ( 0,4 - 19,7 )          | n                           | 0,3 ( 0,0 - 2,0 )          | <b>0,1 ( 0,0 - 1,0 )*</b> | 1,0 ( 0,4 - 2,1 )           | 1,0 ( 0,4 - 2,8 )          |                   |
| Living nearby open sewage:         | 0,2 ( 0,0 - 1,5 )           | n                           | n                           | n                          | n                         | 1,3 ( 0,2 - 9,0 )           | <b>4,7 ( 1,2 - 18,9)*</b>  |                   |
| Sleeping out in open at night:     | <b>1,7 ( 1,2 - 2,4 )**</b>  | n                           | 4,2 ( 0,4 - 40 )            | n                          | <b>3,6 ( 1,4 - 9,2 )*</b> | 0,9 ( 0,2 - 3,5 )           | 1,5 ( 0,4 - 6,4 )          |                   |
| Keeping animal(s):                 | <b>1,6 ( 1,2 - 2,2 )**</b>  | 1,7 ( 0,2 - 2,0 )           | 2,6 ( 0,2 - 29 )            | n                          | 0,3 ( 0,0 - 2,3 )         | 0,6 ( 0,2 - 1,9 )           | 0,7 ( 0,2 - 3,0 )          |                   |
| Exposure to birds:                 | n                           | n                           | n                           | n                          | n                         | n                           | n                          |                   |

**NOTE: Bold face** crude odd ratio(OR) indicates a statistical significant association; with \* for pvalue of 0.05 to ≤ 0.0051, \*\* for pvalue of 0.005 to ≤ 0.00011, and \*\*\* for ≤ 0.0001

A letter "n" represents an association that could not be estimated due to data limitation
